# Supplementary material for: Asymmetric Michael addition in an aqueous environment with the assistance of optically active hyperbranched polymers
Source: Royal Society of Chemistry journal article supplement (doi:10.1039/c7py00036g), 2017-01-01
Supplement: c7py00036g1.pdf [file c7py00036g1.pdf]

## *Supporting Information*

### **Asymmetric Michael Addition in an Aqueous Environment with the Assistance of Optically Active Hyperbranched Polymers**

*Hongli Zhang, Qijin Zhang, Chunyan Hong\* and Gang Zou\**

#### **Author Affiliations**

Key Laboratory of Soft Matter Chemistry, Department of Polymer Science and Engineering, iChEM, University of Science and Technology of China, Hefei, Anhui 230026, China.

\*Corresponding author. Email: gangzou@ustc.edu.cn; hongcy@ustc.edu.cn

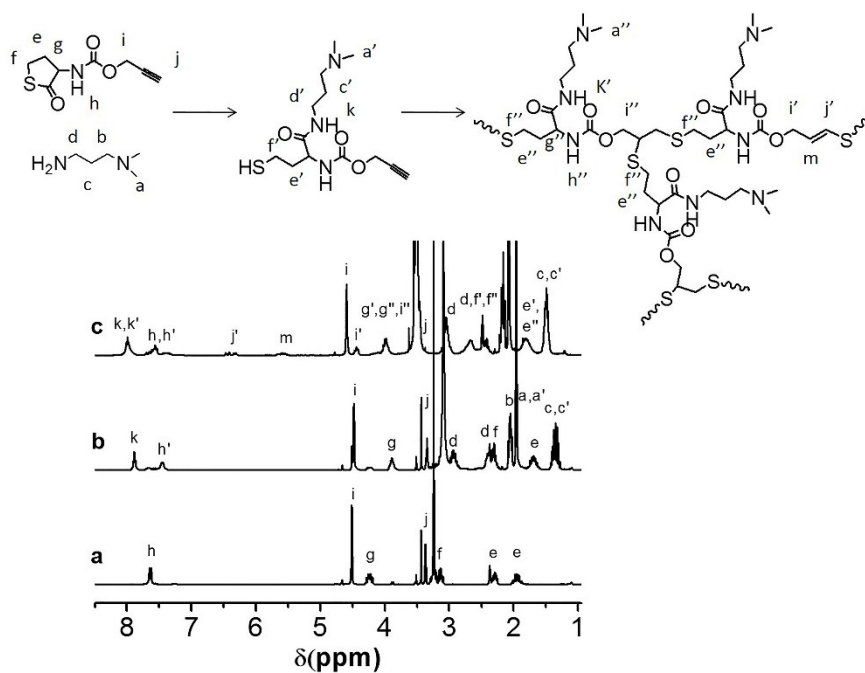

**Figure S1.**  $^1\text{H}$  NMR spectra recorded *in situ* for the reactions of POTC+DMPDA (molar feed ratio is 1:1.25) and thiol-click in DMSO- $d_6$  under irradiation of ultraviolet-light, the time of irradiation is 0 min (a), 30 min (b), 300 min (c).

**Table S1.** Optically active HPBs prepared from pure L-POTC, D-POTC, and the mixture with various molar ratio of L-POTC and D-POTC.

| HPBs   | n(L-POTC)/n(D-POTC)<br>(molar feed ratio) | specific rotation of the<br>obtained HPBs ( $^\circ$ ) |
|--------|-------------------------------------------|--------------------------------------------------------|
| HPBs-1 | 1/0                                       | -8.1                                                   |
| HPBs-2 | 0.75/0.25                                 | -3.9                                                   |
| HPBs-3 | 0.5/0.5                                   | 0                                                      |
| HPBs-4 | 0.33/0.67                                 | 2.6                                                    |
| HPBs-5 | 0.25/0.75                                 | 4.2                                                    |
| HPBs-6 | 0/1                                       | 8.3                                                    |

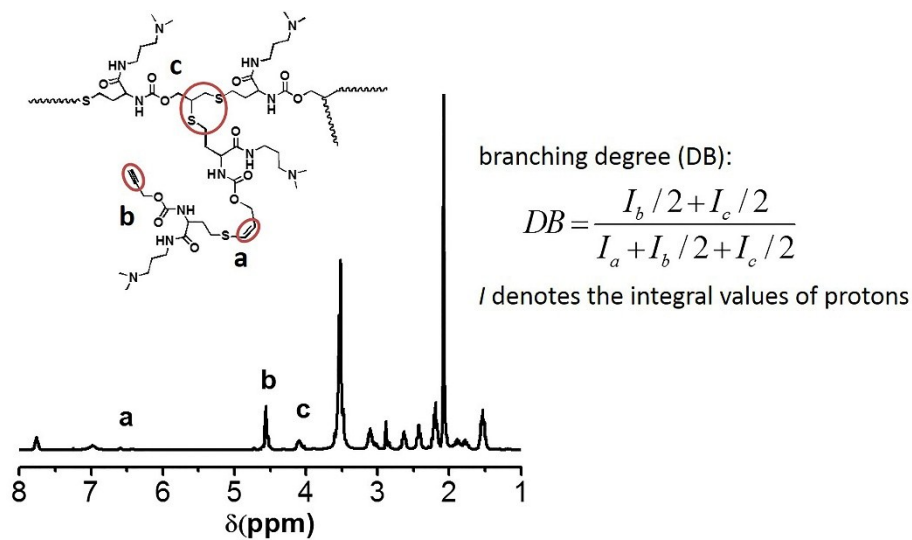

**Figure S2.**  $^1\text{H}$  NMR spectrum of the obtained hyperbranched polymers deviated from racemic POTC monomer.

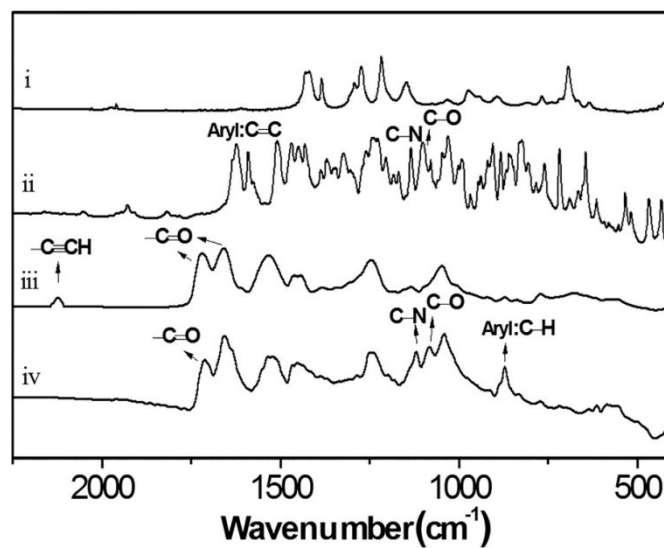

**Figure S3.** Typical FT-IR spectra of (i) 1,2-ethanedithiol, (ii) quinine, (iii) HPBs-3 and (iv) HPBs-3-*co*-quinine (in KBr tablet).

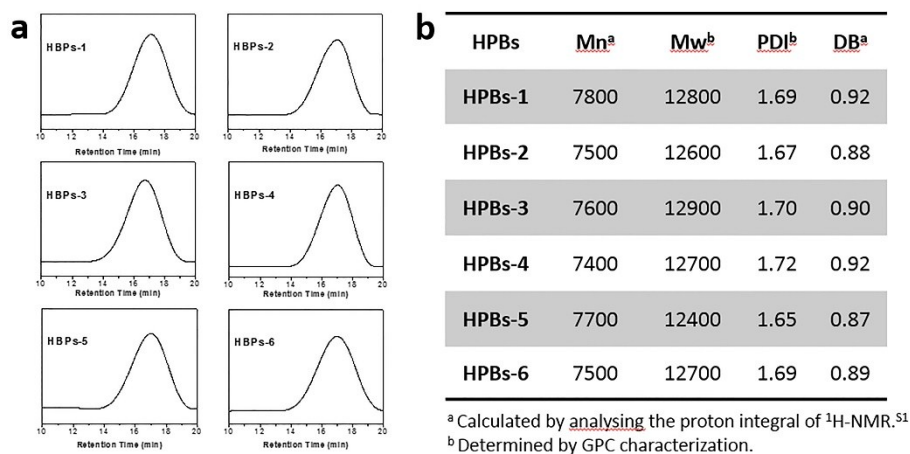

**Figure S4.** (a) GPC curves and (b) The Mn, Mw, PDI and DB of six optically active HPBs.

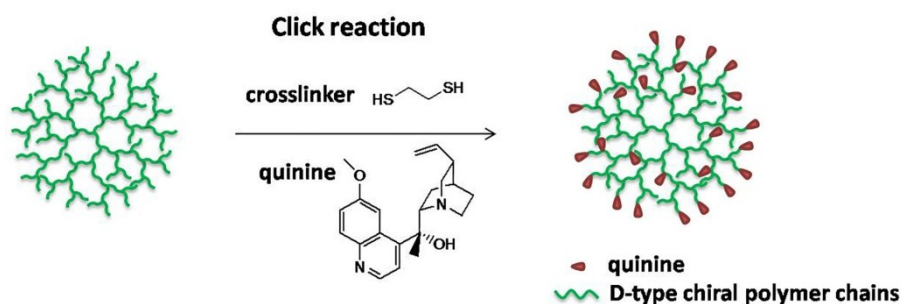

**Scheme S1.** Synthesis route of HPBs-6-co-quinine.

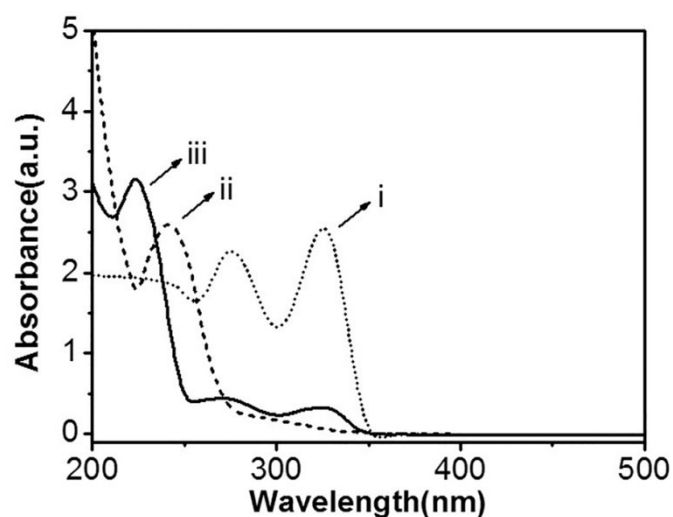

**Figure S5.** UV-vis spectra of (i) quinine, (ii) HPBs-3 and (iii) HPBs-3-co-quinine in the acetonitrile solution.

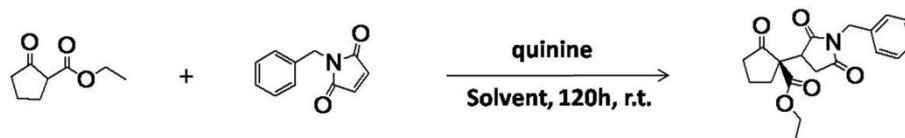

**Scheme S2.** Schematically illustration of the asymmetric Michael addition reaction catalyzed by quinine.

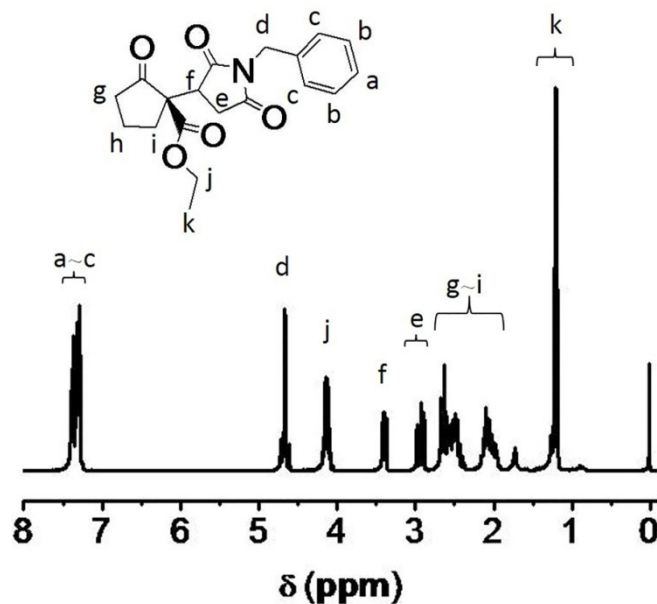

**Figure S6.**  $^1\text{H}$  NMR spectrum of the Michael adduct catalyzed by the quinine and HPBs-6, measured in  $\text{CDCl}_3$  at room temperature.

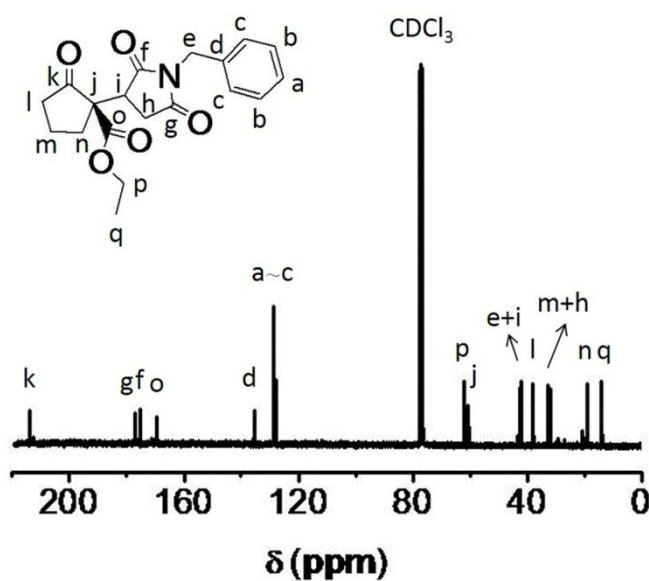

**Figure S7.**  $^{13}\text{C}$  NMR spectrum of the Michael adduct catalyzed by the quinine and HPBs-6, measured in  $\text{CDCl}_3$  at room temperature.

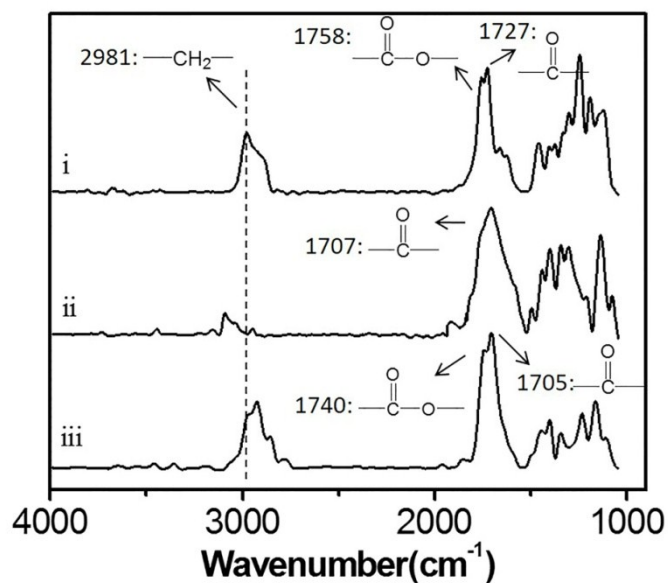

**Figure S8.** Typical FT-IR spectra of (i) 2-carbethoxycyclopentanone, (ii) N-benzylmaleimid and (iii) the Michael adduct catalyzed by quinine and HPBs-6 (in KBr tablet).

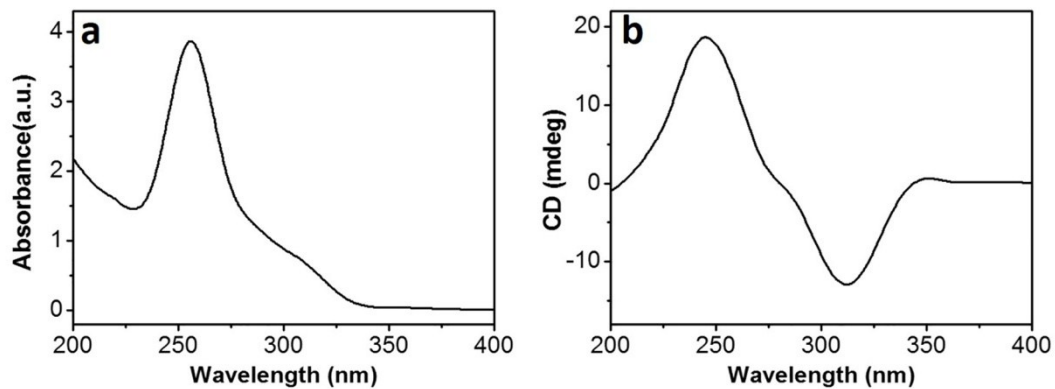

**Figure S9.** (a) UV-vis and (b) CD spectra of the Michael adduct catalyzed by the quinine and HPBs-6.

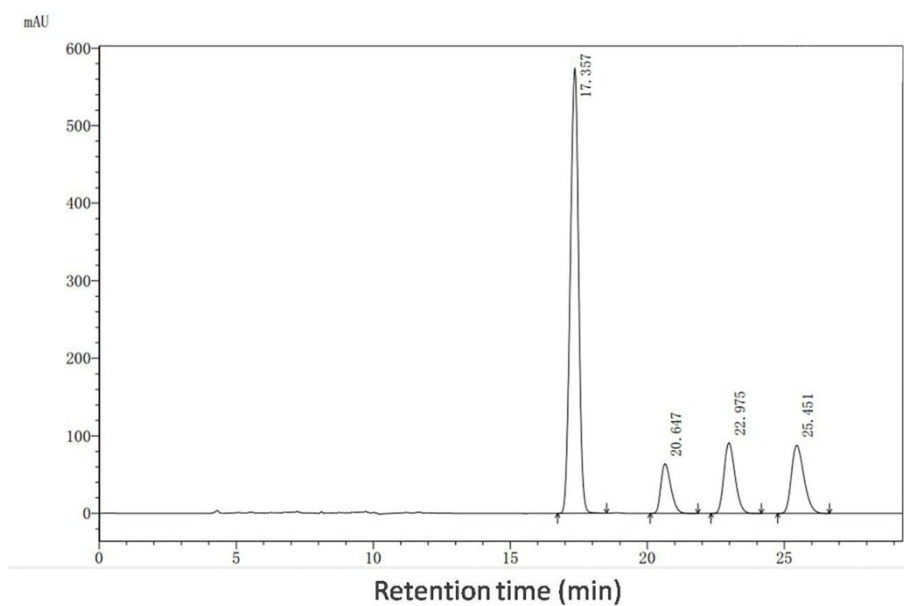

**Figure S10.** HPLC spectrum of the Michael adduct catalyzed by the quinine and HPBs-6 in dichloromethane.

## References

[S1] G. Liu, G. Zhang, J. Hu, X. Wang, M. Zhu, S. Liu, *J. Am. Chem. Soc.*, 2015, 137, 11645-11655.
